# Supplementary material for: An extensive assessment of the performance of pairwise and many-body interaction potentials in reproducing ab initio benchmark binding energies for water clusters n = 2–25
Source: Royal Society of Chemistry journal article supplement (doi:10.1039/d2cp03241d), 2023-01-01
Supplement: d2cp03241d1.pdf [file d2cp03241d1.pdf]

## SUPPORTING INFORMATION

### **An Extensive Assessment of the Performance of Pairwise and Many-body Interaction Potentials in reproducing *ab initio* Benchmark Binding Energies for Water Clusters $n = 2 - 25$**

Kristina M. Herman<sup>a</sup> and Sotiris S. Xantheas<sup>a, b, 1</sup>

<sup>a</sup> Department of Chemistry, University of Washington, Seattle, WA 98195, USA

<sup>b</sup> Advanced Computing, Mathematics and Data Division, Pacific Northwest National Laboratory,  
902 Battelle Boulevard, P.O. Box 999, MS K1-83, WA, 99352, USA

---

<sup>1</sup> Corresponding author. Email: [sotiris.xantheas@pnnl.gov](mailto:sotiris.xantheas@pnnl.gov) and [xantheas@uw.edu](mailto:xantheas@uw.edu)

**Figure SF1.** Extrapolation to the complete basis set (CBS) limit for the water cluster isomers of  $n = 7, 10$  structures used in MBE analysis.<sup>1</sup> The MP2/CBS values for this isomer and the minimum energy structure (slightly different than the one used in the MBE analysis) are indicated with red  $\times$ 's. The “estimate” is produced by averaging the BSSE-corrected and -uncorrected values for each basis set (for MP2/aVDZ:  $\frac{2}{3}D_e + \frac{1}{3}D_e^{CP}$ ).<sup>2</sup>

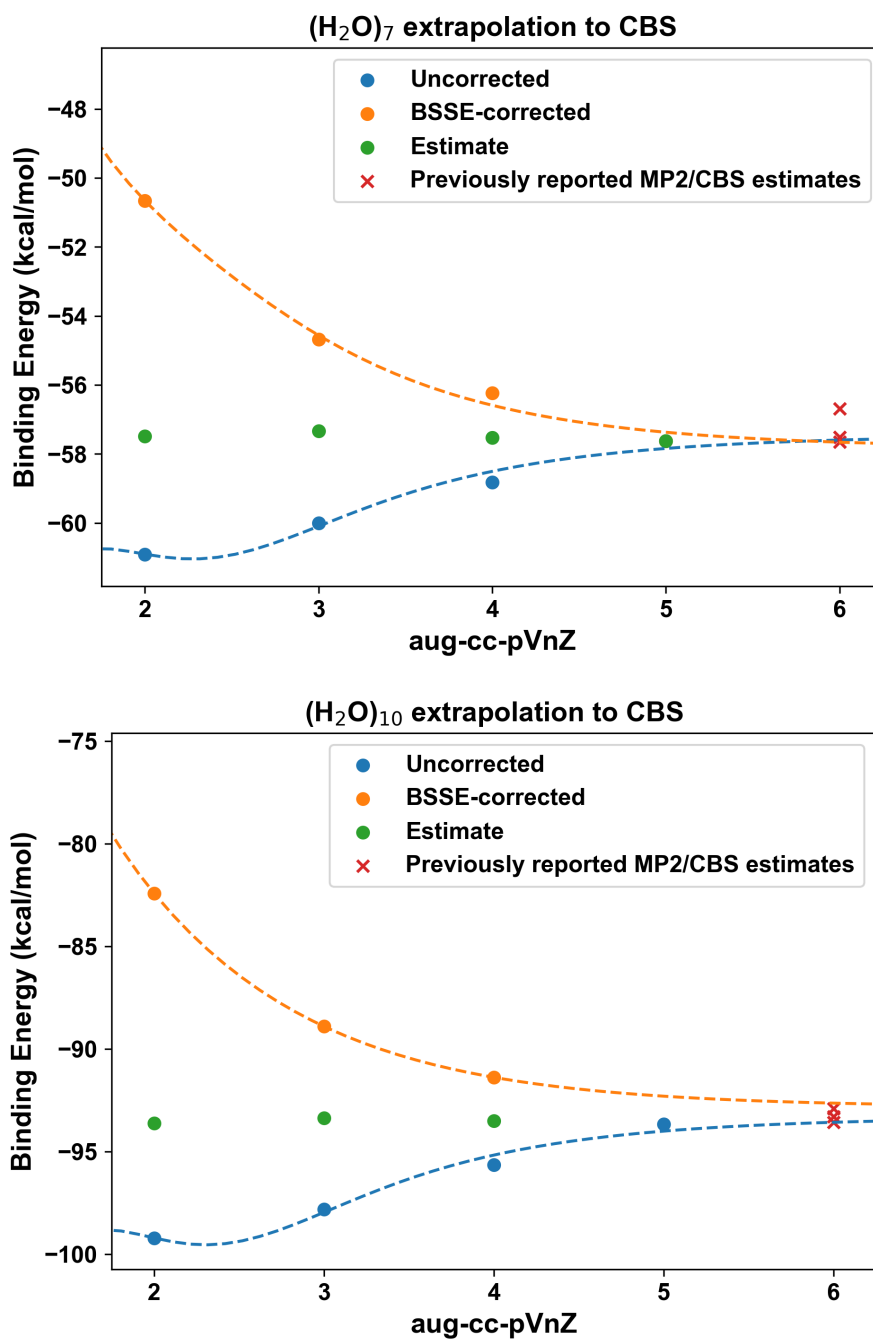

**Figure SF2.** A comparison of the pairwise additive potential performance relative to reference binding energies ( $D_e$ ). The top panel shows the energetic difference (kcal/mol) with respect to the reference values and the bottom panel shows the percent deviation relative to the  $D_e$  reference value for the lowest energy structures for water cluster sizes  $n = 2 - 11, 16, 17, 20, 25$ . The points for which the potential optimizes to a different structure (NSP in Table 2) have been excluded. The shaded gray regions represent the uncertainty in the CBS estimate of the  $D_e$  calculation.

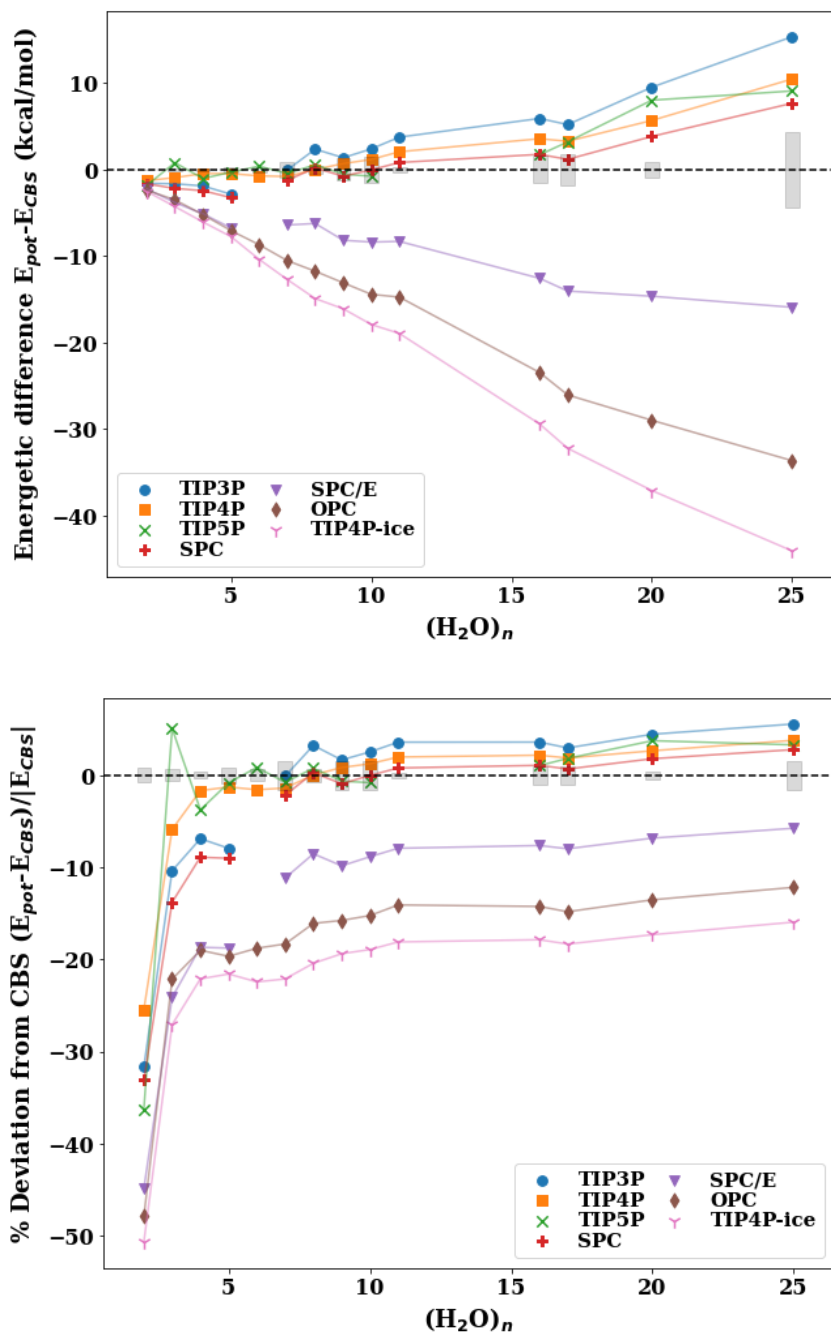

**Figure SF3.** Percent deviation with respect to the  $D_e$  reference value for isomers of  $n = 6, 8, 16, 20$  with the pairwise additive potentials. The points for which the potential optimizes to a different structure (NSP in Table 2) have been excluded. The shaded gray regions represent the uncertainty in the CBS estimate of the  $D_e$  calculation.

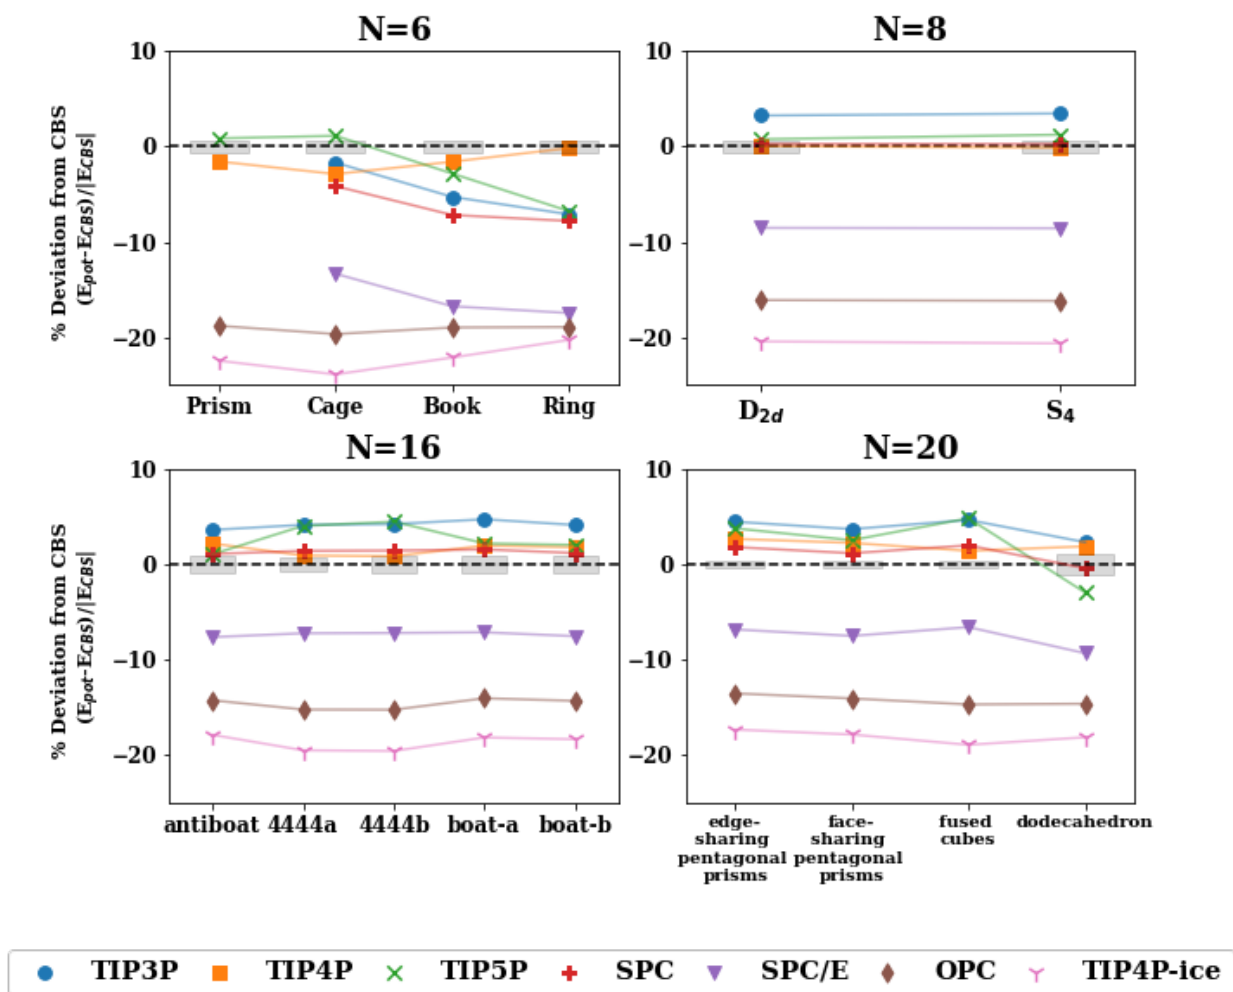

**Figure SF4.** A comparison of the pairwise additive potential performance relative to reference binding energies ( $D_0$ ). The top panel shows the energetic difference (kcal/mol) with respect to the reference values and the bottom panel shows the percent deviation relative to the  $D_0$  reference value for the lowest energy structures for water cluster sizes  $n = 2 - 11, 16, 17, 20, 25$ . The points for which the potential optimizes to a different structure (NSP in Table 2) have been excluded. The shaded gray regions represent the uncertainty in the CBS estimate of the  $D_e$  calculation.

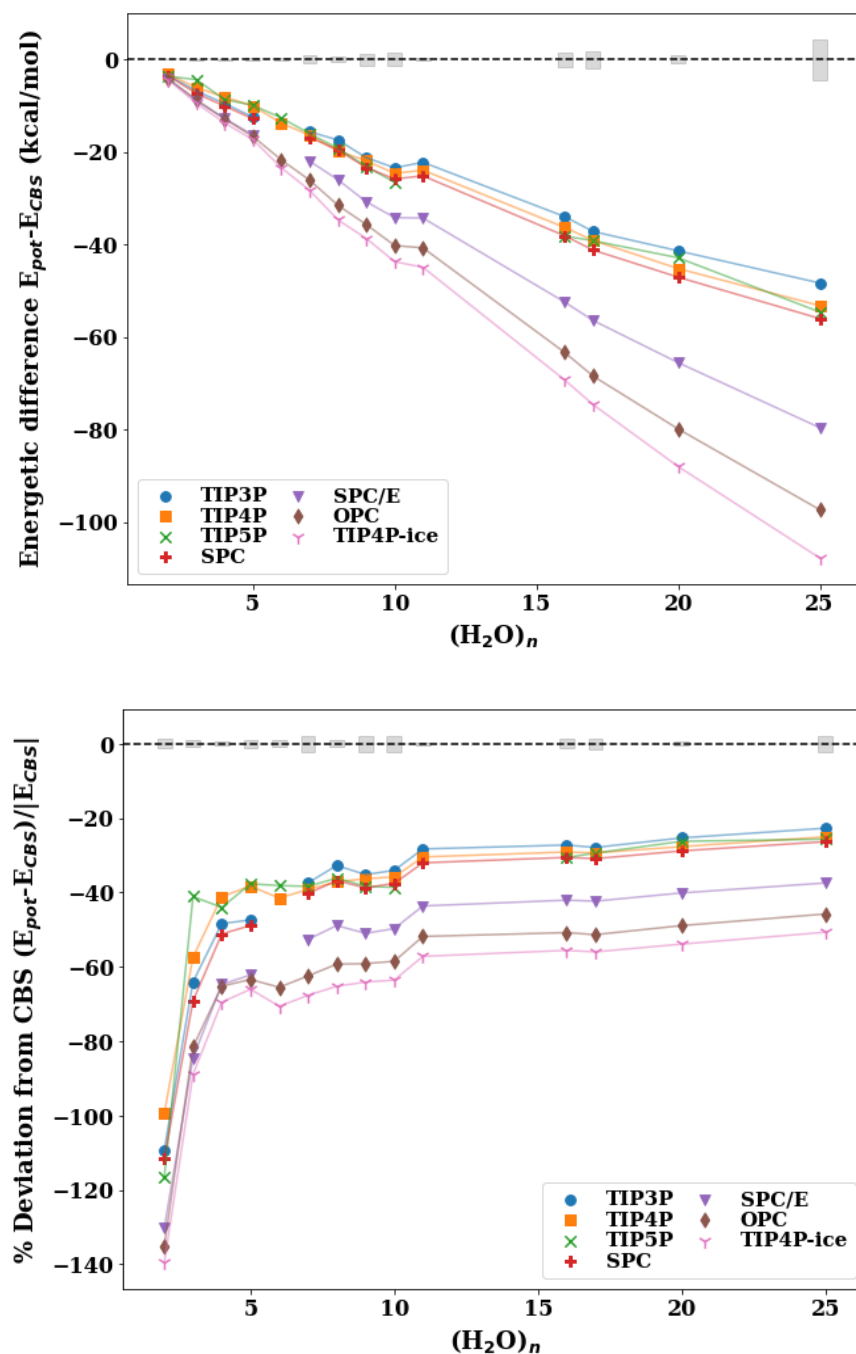

**Figure SF5.** Percent deviation with respect to the  $D_0$  reference value for isomers of  $n = 6, 8, 16, 20$  with the pairwise additive potentials. The points for which the potential optimizes to a different structure (NSP in Table 2) have been excluded. The shaded gray regions represent the uncertainty in the CBS estimate of the  $D_e$  calculation.

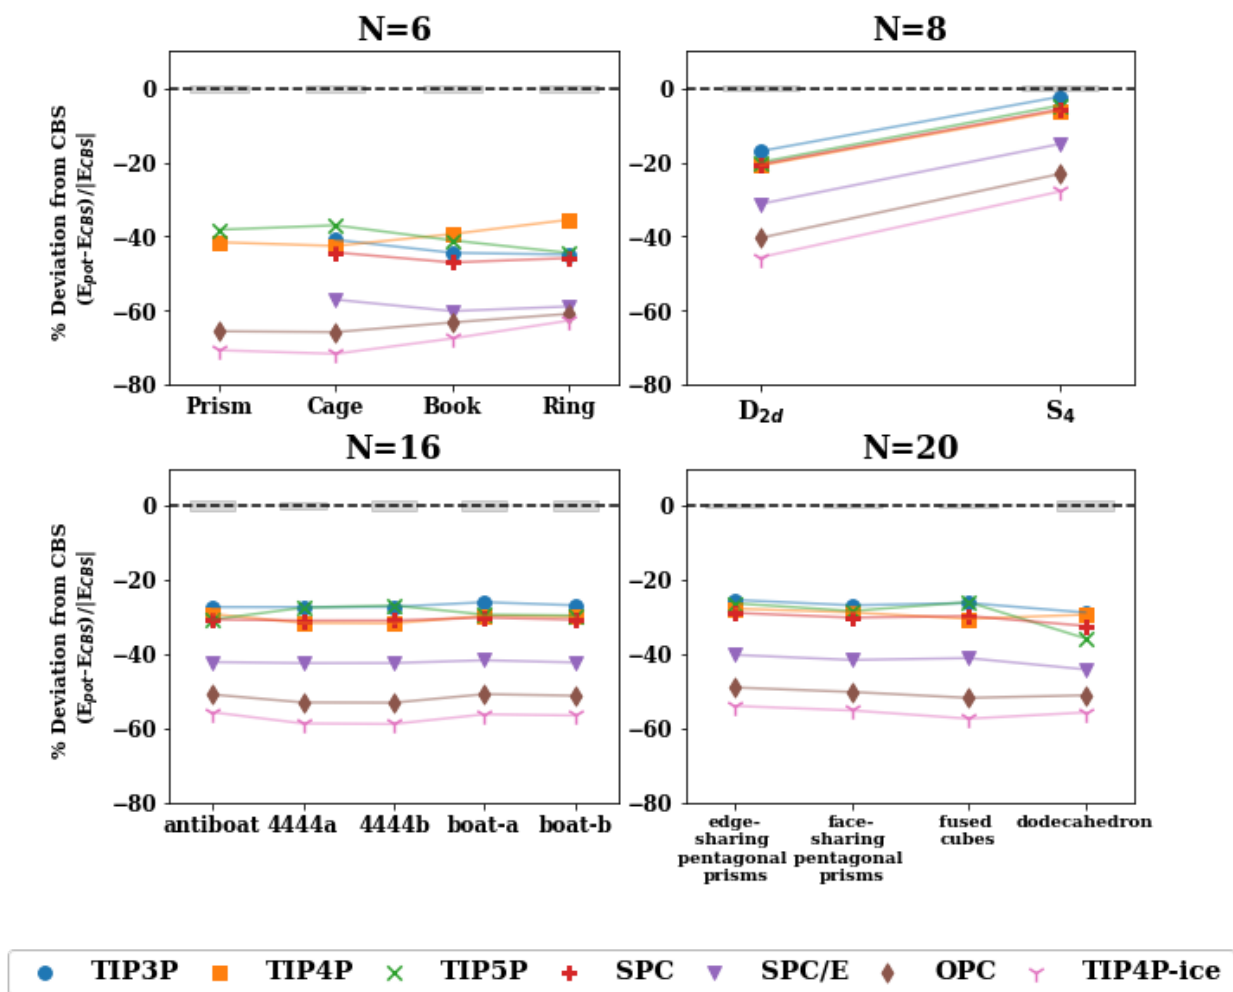

**Figure SF6.** A comparison of the different versions of the AMOEBA potential (AMOEBA03, AMOEBA14, iAMOEBA, AMOEBA+, AMOEBA+CF) through the percent error on the total binding energy of water clusters,  $n = 2-11, 16-17, 20, 25$ . The shaded gray regions represent the uncertainty in the CBS estimate of the  $D_e$  calculation.

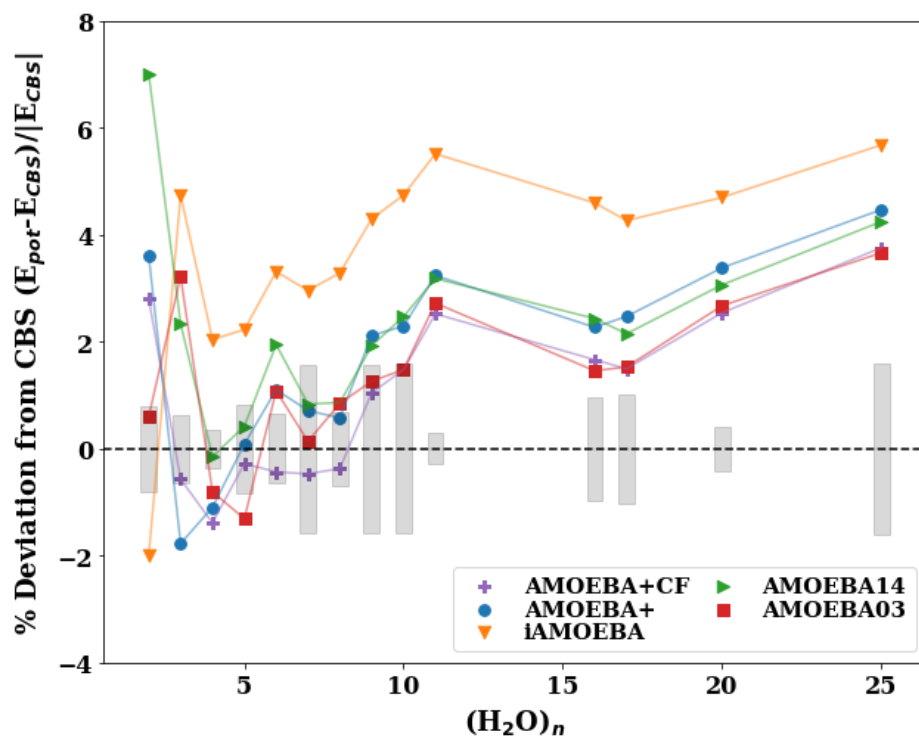

**Figure SF7.** A comparison of the different versions of the EFP potential (EFP1(RHF), EFP1(DFT), EFP1(RHF)-D3, EFP2(E6), EFP2(E6+E7), EFP2(E6+E7+E8)) through the percent error on the total binding energy of water clusters,  $n = 2-11, 16-17, 20, 25$ . The shaded gray regions represent the uncertainty in the CBS estimate of the  $D_e$  calculation.

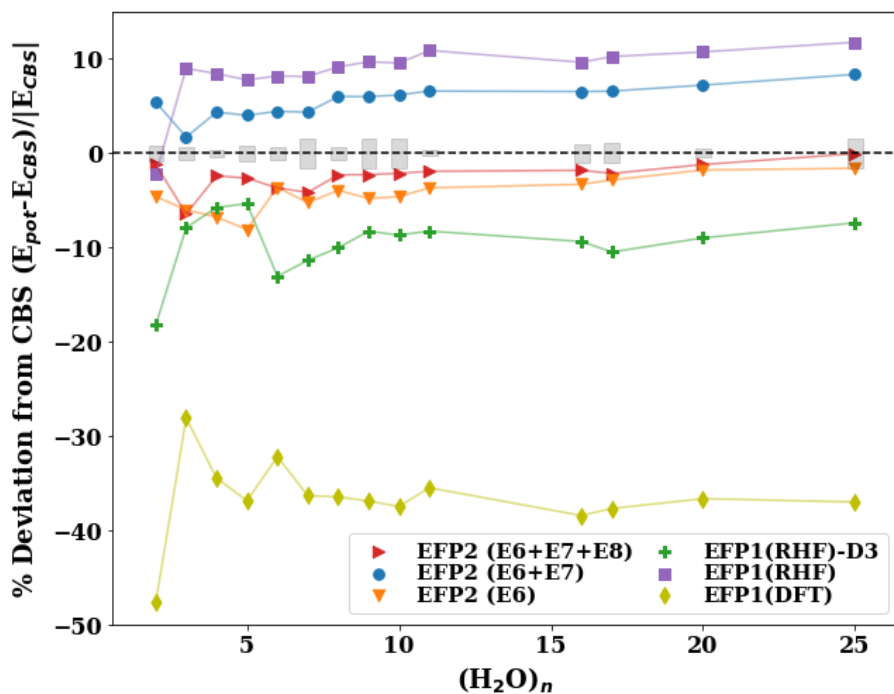



**Table ST1.** Classification and properties of pairwise and many-body potentials used in this study.

| Pairwise additive potentials (2-body potentials) |                |                                        |             |                            |                            |                                                                                                                                                                                                                                                                                                                                                                                                                                                                                                                         |
|--------------------------------------------------|----------------|----------------------------------------|-------------|----------------------------|----------------------------|-------------------------------------------------------------------------------------------------------------------------------------------------------------------------------------------------------------------------------------------------------------------------------------------------------------------------------------------------------------------------------------------------------------------------------------------------------------------------------------------------------------------------|
|                                                  | Rigid/flexible | Number of sites                        | Dissociable | Polarizable                | Permanent molecular dipole | Reference                                                                                                                                                                                                                                                                                                                                                                                                                                                                                                               |
| TIP3P                                            | Rigid          | 3                                      | No          | No                         | 2.35                       | Jorgensen, W. L. Quantum and Statistical Mechanical Studies of Liquids. 10. Transferable Intermolecular Potential Functions for Water, Alcohols, and Ethers. Application to Liquid Water. <i>J. Am. Chem. Soc.</i> 1981, 103 (2), 335–340.                                                                                                                                                                                                                                                                              |
| TIP4P                                            | Rigid          | 4                                      | No          | No                         | 2.18                       | Jorgensen, W. L. Quantum and Statistical Mechanical Studies of Liquids. 10. Transferable Intermolecular Potential Functions for Water, Alcohols, and Ethers. Application to Liquid Water. <i>J. Am. Chem. Soc.</i> 1981, 103 (2), 335–340.; Abascal, J. L. F.; Vega, C. A General Purpose Model for the Condensed Phases of Water: TIP4P/2005. <i>J. Chem. Phys.</i> 2005, 123 (23), 234505.                                                                                                                            |
| TIP5P                                            | Rigid          | 5                                      | No          | No                         | 2.29                       | Mahoney, M. W.; Jorgensen, W. L. A Five-Site Model for Liquid Water and the Reproduction of the Density Anomaly by Rigid, Nonpolarizable Potential Functions. <i>J. Chem. Phys.</i> 2000, 112 (20), 8910–8922.                                                                                                                                                                                                                                                                                                          |
| SPC                                              | Rigid          | 3                                      | No          | No                         | 2.27                       | Berendsen, H. J. C.; Postma, J. P. M.; Gunsteren, W. F. V.; Hermans, J. <i>Company. INTERACTION MODELS FOR WATER IN RELATION TO PROTEIN HYDRATION.</i>                                                                                                                                                                                                                                                                                                                                                                  |
| SPC/E                                            | Rigid          | 3                                      | No          | No                         | 2.35                       | Berendsen, H. J. C.; Grigera, J. R.; Straatsma, T. P. The Missing Term in Effective Pair Potentials. <i>J. Phys. Chem.</i> 1987, 91 (24), 6269–6271.                                                                                                                                                                                                                                                                                                                                                                    |
| OPC                                              | Rigid          | 4                                      | No          | No                         | 2.48                       | Izadi, S.; Anandakrishnan, R.; Onufriev, A. V. Building Water Models: A Different Approach. <i>J. Phys. Chem. Lett.</i> 2014, 5 (21), 3863–3871.                                                                                                                                                                                                                                                                                                                                                                        |
| TIP4P-ice                                        | Rigid          | 4                                      | No          | No                         | 2.43                       | Abascal, J. L. F.; Sanz, E.; García Fernández, R.; Vega, C. A Potential Model for the Study of Ices and Amorphous Water: TIP4P/Ice. <i>J. Chem. Phys.</i> 2005, 122 (23), 234511.                                                                                                                                                                                                                                                                                                                                       |
| Many-body potentials                             |                |                                        |             |                            |                            |                                                                                                                                                                                                                                                                                                                                                                                                                                                                                                                         |
|                                                  | Rigid/flexible | Implicit/Explicit many-body potentials | Dissociable | Polarizable                |                            | Reference                                                                                                                                                                                                                                                                                                                                                                                                                                                                                                               |
| TTM2.1-F                                         | Flexible       | Implicit                               | No          | Yes                        |                            | Fanourgakis, G. S.; Xantheas, S. S. The Flexible, Polarizable, Thole-Type Interaction Potential for Water (TTM2-F) Revisited. <i>J. Phys. Chem. A</i> 2006, 110 (11), 4100–4106.                                                                                                                                                                                                                                                                                                                                        |
| TTM3-F                                           | Flexible       | Implicit                               | No          | Yes                        |                            | Fanourgakis, G. S.; Xantheas, S. S. Development of Transferable Interaction Potentials for Water. V. Extension of the Flexible, Polarizable, Thole-Type Model Potential (TTM3-F, v. 3.0) to Describe the Vibrational Spectra of Water Clusters and Liquid Water. <i>J. Chem. Phys.</i> 2008, 128 (7), 074506.                                                                                                                                                                                                           |
| EFP2                                             | Rigid          | Implicit                               | No          | Yes                        |                            | Guidex, E. B.; Gordon, M. S. Dispersion Interactions in Water Clusters. <i>J. Phys. Chem. A</i> 2017, 121 (19), 3736–3745.                                                                                                                                                                                                                                                                                                                                                                                              |
| AMOEBa+CF                                        | Flexible       | Implicit                               | No          | Yes                        |                            | Liu, C.; Piquemal, J.-P.; Ren, P. Implementation of Geometry-Dependent Charge Flux into the Polarizable AMOEBa+ Potential. <i>J. Phys. Chem. Lett.</i> 2020, 11 (2), 419–426.                                                                                                                                                                                                                                                                                                                                           |
| MB-UCB                                           | Flexible       | Implicit                               | No          | Yes                        |                            | Das, A. K.; Urban, L.; Leven, I.; Loipersberger, M.; Aldossary, A.; Head-Gordon, M.; Head-Gordon, T. Development of an Advanced Force Field for Water Using Variational Energy Decomposition Analysis. <i>J. Chem. Theory Comput.</i> 2019, 15 (9), 5001–5013.                                                                                                                                                                                                                                                          |
| HIPPO                                            | Flexible       | Implicit                               | No          | Yes                        |                            | Rackers, J. A.; Silva, R. R.; Wang, Z.; Ponder, J. W. Polarizable Water Potential Derived from a Model Electron Density. <i>J. Chem. Theory Comput.</i> 2021, 17 (11), 7056–7084.                                                                                                                                                                                                                                                                                                                                       |
| CC-pol                                           | Rigid          | Explicit                               | No          | No                         |                            | Góra, U.; Cencek, W.; Podeszwa, R.; van der Avoird, A.; Szalewicz, K. Predictions for Water Clusters from a First-Principles Two- and Three-Body Force Field. <i>J. Chem. Phys.</i> 2014, 140 (19), 194101.; Bukowski, R.; Szalewicz, K.; Groenenboom, G. C. Predictions of the Properties of Water from First Principles. 2007, 315, 5.                                                                                                                                                                                |
| WHBB5                                            | Flexible       | Explicit                               | No          | Yes (base model is TTM3-F) |                            | Wang, Y.; Huang, X.; Shepler, B. C.; Braams, B. J.; Bowman, J. M. Flexible, <i>Ab Initio</i> Potential, and Dipole Moment Surfaces for Water. I. Tests and Applications for Clusters up to the 22-Mer. <i>J. Chem. Phys.</i> 2011, 134 (9), 094509.; Góra, U.; Podeszwa, R.; Cencek, W.; Szalewicz, K. Interaction Energies of Large Clusters from Many-Body Expansion. <i>J. Chem. Phys.</i> 2011, 135 (22), 224102.                                                                                                   |
| WHBB6                                            | Flexible       | Explicit                               | No          | Yes (base model is TTM3-F) |                            | Wang, Y.; Huang, X.; Shepler, B. C.; Braams, B. J.; Bowman, J. M. Flexible, <i>Ab Initio</i> Potential, and Dipole Moment Surfaces for Water. I. Tests and Applications for Clusters up to the 22-Mer. <i>J. Chem. Phys.</i> 2011, 134 (9), 094509.                                                                                                                                                                                                                                                                     |
| MB-pol                                           | Flexible       | Explicit                               | No          | Yes (base model is TTM4-F) |                            | Babin, V.; Leforestier, C.; Paesani, F. Development of a “First Principles” Water Potential with Flexible Monomers: Dimer Potential Energy Surface, VRT Spectrum, and Second Virial Coefficient. <i>J. Chem. Theory Comput.</i> 2013, 9 (12), 5395–5403.; Babin, V.; Medders, G. R.; Paesani, F. Development of a “First Principles” Water Potential with Flexible Monomers. II: Trimer Potential Energy Surface, Third Virial Coefficient, and Small Clusters. <i>J. Chem. Theory Comput.</i> 2014, 10 (4), 1599–1607. |
| q-AQUA                                           | Flexible       | Explicit                               | No          | No                         |                            | Yu, Q.; Qu, C.; Houston, P. L.; Conte, R.; Nandi, A.; Bowman, J. M. Q-AQUA: A Many-Body CCSD(T) Water Potential, Including Four-Body Interactions, Demonstrates the Quantum Nature of Water from Clusters to the Liquid Phase. <i>J. Phys. Chem. Lett.</i> 2022, 5068–5074.                                                                                                                                                                                                                                             |

**Table ST2.** Binding energies (kcal/mol) of water clusters with the pairwise additive potentials, obtained using Gromacs compiled in mixed precision (default). NSP (Not a Stationary Point) means that the water cluster optimized to a different structure.

| <i>n</i>  | Isomer                         | TIP3P      | TIP4P   | TIP5P      | SPC        | SPC/E      | OPC     | TIP4P/ice |
|-----------|--------------------------------|------------|---------|------------|------------|------------|---------|-----------|
| <b>2</b>  |                                | -6.57      | -6.26   | -6.80      | -6.64      | -7.23      | -7.37   | -7.52     |
| <b>3</b>  |                                | -17.44     | -16.73  | -15        | -17.98     | -19.61     | -19.30  | -20.07    |
| <b>4</b>  |                                | -29.28     | -27.86  | -28.43     | -29.83     | -32.51     | -32.60  | -33.46    |
| <b>5</b>  |                                | -38.74     | -36.35  | -36.08     | -39.12     | -42.62     | -42.94  | -43.64    |
| <b>6</b>  | prism                          | <i>NSP</i> | -46.93  | -45.81     | <i>NSP</i> | <i>NSP</i> | -54.87  | -56.56    |
|           | cage                           | -46.67     | -47.22  | -45.38     | -47.80     | -52.02     | -54.88  | -56.85    |
|           | book                           | -47.79     | -46.12  | -46.68     | -48.65     | -52.99     | -53.98  | -55.43    |
|           | ring                           | -47.45     | -44.38  | -47.30     | -47.76     | -52.03     | -52.68  | -53.27    |
| <b>7</b>  |                                | -57.45     | -58.20  | -57.84     | -58.64     | -63.80     | -67.91  | -70.09    |
| <b>8</b>  | D <sub>2d</sub>                | -70.64     | -72.97  | -72.45     | -72.81     | -79.23     | -84.74  | -87.91    |
|           | S <sub>4</sub>                 | -70.38     | -73.00  | -72.01     | -72.72     | -79.14     | -84.69  | -87.94    |
| <b>9</b>  | D <sub>2d</sub> DD             | -81.62     | -82.28  | -83.53     | -83.75     | -91.16     | -96.08  | -99.07    |
| <b>10</b> |                                | -92.20     | -93.43  | -95.37     | -94.62     | -102.98    | -109.01 | -112.51   |
| <b>11</b> | 43'4                           | -100.84    | -102.54 | <i>NSP</i> | -103.77    | -112.89    | -119.33 | -123.54   |
| <b>16</b> | antiboat                       | -158.68    | -161.02 | -162.89    | -162.83    | -177.16    | -188.04 | -194.00   |
|           | 4444-a                         | -157.43    | -162.71 | -157.62    | -161.91    | -176.08    | -189.18 | -196.19   |
|           | 4444-b                         | -157.20    | -162.72 | -156.76    | -161.76    | -175.92    | -189.09 | -196.20   |
|           | boat a                         | -156.66    | -161.19 | -160.82    | -161.85    | -176.13    | -187.47 | -194.22   |
|           | boat b                         | -157.45    | -161.26 | -160.87    | -162.27    | -176.57    | -187.67 | -194.29   |
| <b>17</b> | sphere                         | -170.49    | -172.42 | -172.49    | -174.52    | -189.73    | -201.73 | -207.91   |
| <b>20</b> | edge-sharing pentagonal prisms | -204.67    | -208.51 | -206.17    | -210.36    | -228.83    | -243.16 | -251.29   |
|           | face-sharing pentagonal prisms | -204.11    | -207.16 | -206.56    | -209.46    | -227.81    | -241.68 | -249.69   |
|           | fused cubes                    | -200.85    | -207.65 | -200.48    | -206.44    | -224.48    | -241.53 | -250.44   |
|           | pentagonal dodecahedron (A3)   | -196.16    | -197.05 | -206.75    | -201.65    | -219.51    | -230.13 | -237.20   |
| <b>25</b> | isomer 2                       | -260.92    | -265.81 | -267.20    | -268.61    | -292.21    | -309.91 | -320.33   |

**Table ST3.** Binding energies (kcal/mol) of water clusters with additional (often older variants) many-body potentials.

| <i>n</i> | Isomer                             | AMOEBA-<br>03 | iAMOE<br>BA | AMOE<br>BA-14 | AMOE<br>BA+ | EFPI(R<br>HF) | EFPI(D<br>FT) | EFPI(R<br>HF)-D3 | EFPI(E<br>6) | EFPI(E6<br>+E7) |
|----------|------------------------------------|---------------|-------------|---------------|-------------|---------------|---------------|------------------|--------------|-----------------|
| 2        |                                    | -4.96         | -5.09       | -4.64         | -4.81       | -5.10         | -7.37         | -5.90            | -5.22        | -4.72           |
| 3        |                                    | -15.29        | -15.05      | -15.43        | -16.08      | -14.38        | -20.24        | -17.05           | -16.75       | -15.53          |
| 4        |                                    | -27.62        | -26.84      | -27.44        | -27.70      | -25.09        | -36.85        | -28.98           | -29.26       | -26.21          |
| 5        |                                    | -36.37        | -35.10      | -35.75        | -35.87      | -33.11        | -49.14        | -37.82           | -38.81       | -34.46          |
| 6        | prism                              | -45.70        | -44.67      | -45.30        | -45.69      | -42.42        | -61.08        | -52.24           | -47.88       | -44.15          |
|          | cage                               | -45.73        | -44.41      | -45.84        | -45.79      | -41.90        | -61.52        | -50.95           | -47.62       | -43.48          |
|          | book                               | -45.60        | -44.18      | -45.10        | -45.43      | -41.76        | -62.05        | -48.97           | -48.53       | -43.59          |
|          | ring                               | -44.63        | -43.39      | -43.50        | -44.00      | -41.15        | -60.66        | -46.66           | -48.33       | -43.00          |
| 7        |                                    | -57.32        | -55.70      | -56.92        | -56.99      | -52.73        | -78.26        | -63.925          | -60.42       | -54.90          |
| 8        | D <sub>2d</sub>                    | -72.38        | -70.60      | -72.37        | -72.58      | -66.32        | -99.63        | -80.33           | -75.88       | -68.61          |
|          | S <sub>4</sub>                     | -72.37        | -70.63      | -72.36        | -72.56      | -66.25        | -99.24        | -80.25           | -75.77       | -68.51          |
| 9        | D <sub>2d</sub> DD                 | -81.95        | -79.43      | -81.40        | -81.24      | -74.95        | -113.64       | -89.88           | -86.99       | -78.03          |
| 10       |                                    | -93.20        | -90.11      | -92.26        | -92.43      | -85.56        | -130.05       | -102.82          | -98.97       | -88.76          |
| 11       | 43'4                               | -101.75       | -98.83      | -101.27       | -101.21     | -93.21        | -141.74       | -113.25          | -108.45      | -97.71          |
| 16       | antiboat                           | -162.20       | -157.03     | -160.59       | -160.86     | -148.73       | -227.89       | -180.04          | -170.04      | -153.84         |
|          | 4444-a                             | -161.18       | -157.75     | -161.83       | -161.12     | -147.83       | -223.41       | -183.18          | -168.26      | -154.28         |
|          | 4444-b                             | -160.98       | -157.72     | -161.50       | -160.57     | -147.45       | -222.12       | -182.84          | -167.68      | -153.75         |
|          | boat a                             | -161.35       | -157.89     | -160.75       | -161.43     | -147.98       | -226.25       | -179.16          | -170.36      | -153.97         |
|          | boat b                             | -161.52       | -157.93     | -160.68       | -161.16     | -148.08       | -226.08       | -179.37          | -170.69      | -154.26         |
| 17       | sphere                             | -173.01       | -168.20     | -171.92       | -171.35     | -157.70       | -241.94       | -194.13          | -180.70      | -164.15         |
| 20       | edge-sharing<br>pentagonal prisms  | -208.47       | -204.13     | -207.63       | -206.95     | -191.20       | -292.73       | -233.46          | -218.03      | -198.74         |
|          | face-sharing<br>pentagonal prisms  | -206.13       | -199.63     | -204.85       | -203.68     | -189.14       | -289.23       | -232.84          | -218.40      | -198.19         |
|          | fused cubes                        | -205.79       | -201.51     | -206.63       | -205.67     | -188.83       | -285.71       | -234.86          | -214.36      | -197.00         |
|          | pentagonal<br>dodecahedron<br>(A3) | -197.24       | -191.78     | -193.75       | -194.72     | -181.62       | -280.59       | -214.91          | -212.29      | -187.66         |
|          | isomer 2                           | -266.17       | -260.60     | -264.56       | -263.94     | -243.79       | -378.56       | -296.73          | -280.77      | -253.22         |

**Table ST4.** The differences between BSSE-corrected MP2/aVTZ many-body terms and average (BSSE-corrected and -uncorrected) MP2/aVTZ many-body terms against MP2/aV5Z results. The italicized values indicate the smallest errors, and the bold values indicate the most comparable MP2/aVTZ value to the MP2/aV5Z reference. This justifies our use of averaged MP2/aVTZ 2- and 3-body terms and BSSE-corrected MP2/aVTZ values for the 4-body as an estimate of those respective values with a larger (aV5Z) basis set for (H<sub>2</sub>O)<sub>16</sub>. All (H<sub>2</sub>O)<sub>7</sub> and (H<sub>2</sub>O)<sub>10</sub> results are taken from the SI of Heindel et. al 2020.<sup>1</sup>

|                                      | <i>n</i> -<br>body | MP2/AVTZ | BSSE<br>MP2/aVTZ | Average<br>MP2/aVTZ | MP2/aV5Z | BSSE<br>MP2/aV5Z | BSSE<br>MP2/aVTZ<br>vs.<br>MP2/aV5Z | Average<br>MP2/aVTZ<br>vs.<br>MP2/aV5Z |
|--------------------------------------|--------------------|----------|------------------|---------------------|----------|------------------|-------------------------------------|----------------------------------------|
| <b>(H<sub>2</sub>O)<sub>7</sub></b>  | 2B                 | -49.459  | -43.958          | <b>-46.709</b>      | -47.160  | -47.165          | 3.202                               | <i>0.456</i>                           |
|                                      | 3B                 | -12.030  | -12.313          | <b>-12.172</b>      | -12.191  | -12.181          | -0.122                              | <i>0.009</i>                           |
|                                      | 4B                 | -1.106   | <b>-0.874</b>    | -0.990              | -0.841   | -0.854           | <i>-0.033</i>                       | -0.136                                 |
| <b>(H<sub>2</sub>O)<sub>10</sub></b> | 2B                 | -78.707  | -69.504          | <b>-74.106</b>      | -74.796  | n/a              | 5.292                               | <i>0.691</i>                           |
|                                      | 3B                 | -21.285  | -21.989          | <b>-21.637</b>      | -21.625  | n/a              | -0.364                              | <i>-0.012</i>                          |
|                                      | 4B                 | -3.028   | <b>-1.978</b>    | -2.503              | -1.878   | n/a              | <i>-0.100</i>                       | -0.625                                 |
| <b>(H<sub>2</sub>O)<sub>16</sub></b> | 2B                 | -138.62  | -122.523         | <b>-130.572</b>     | n/a      | n/a              | n/a                                 | n/a                                    |
|                                      | 3B                 | -36.417  | -37.657          | <b>-37.037</b>      | n/a      | n/a              | n/a                                 | n/a                                    |
|                                      | 4B                 | -4.997   | <b>-2.142</b>    | -3.570              | n/a      | n/a              | n/a                                 | n/a                                    |

**Table ST5.** The ratio of SPC and SPC/E energies (obtained with Gromacs in DP).

| <i>n</i> | Isomer                         | SPC     | SPC/E   | Ratio SPC:<br>SPC/E |
|----------|--------------------------------|---------|---------|---------------------|
| 2        |                                | -6.64   | -7.23   | 0.918               |
| 3        |                                | -17.98  | -19.61  | 0.917               |
| 4        |                                | -29.84  | -32.52  | 0.918               |
| 5        |                                | -39.14  | -42.64  | 0.918               |
| 6        | prism                          | -47.35  | -51.52  | 0.919               |
|          | cage                           | -47.81  | -52.02  | 0.919               |
|          | book                           | -48.66  | -53.00  | 0.918               |
|          | ring                           | -47.76  | -52.03  | 0.918               |
| 7        |                                | -58.65  | -63.81  | 0.919               |
| 8        | D2d                            | -72.81  | -79.23  | 0.919               |
|          | S4                             | -72.81  | -79.23  | 0.919               |
| 9        | D2dDD                          | -83.77  | -91.17  | 0.919               |
| 10       |                                | -94.63  | -102.98 | 0.919               |
| 11       | 43'4                           | -103.78 | -112.9  | 0.919               |
| 16       | antiboat                       | -162.84 | -177.17 | 0.919               |
|          | 4444-a                         | -161.91 | -176.08 | 0.920               |
|          | 4444-b                         | -161.76 | -175.92 | 0.920               |
|          | boat a                         | -161.86 | -176.13 | 0.919               |
|          | boat b                         | -162.29 | -176.58 | 0.919               |
| 17       | sphere                         | -174.52 | -189.74 | 0.920               |
| 20       | edge-sharing pentagonal prisms | -210.37 | -228.84 | 0.919               |
|          | face-sharing pentagonal prisms | -209.47 | -227.82 | 0.919               |
|          | fused cubes                    | -206.44 | -224.48 | 0.920               |
|          | pentagonal dodecahedron (A3)   | -201.66 | -219.52 | 0.919               |
| 25       | isomer 2                       | -268.63 | -292.22 | 0.919               |

**Table ST6.** Cartesian coordinates for water clusters used in molecular dipole analysis.

**Singly solvated monomer ( $N = 5$ )**

15  
-381.680759840801 a.u. (MP2/aVTZ)  
O -0.00354472 -0.08149026 0.01491547  
H -0.39032271 0.74241384 -0.32014335  
H 0.92751433 -0.05263168 -0.25792714  
O -0.08995661 -0.11714257 2.87959018  
H -0.07602037 -0.13535657 1.90811717  
H -0.42363594 -0.98426489 3.12351228  
O 2.70157691 -0.05359097 -0.85190341  
H 3.43241397 0.55483635 -0.71236704  
H 3.05524812 -0.75650624 -1.40467879  
O -1.30672697 -2.41143972 -1.00824991  
H -2.03478178 -2.10209935 -1.55236159  
H -0.89189792 -1.59812893 -0.67322552  
O -1.33926007 2.26076533 -0.95303245  
H -2.26755199 2.39679908 -0.7418469  
H -1.08742531 3.02190474 -1.48316964

**Singly solvated dimer ( $N = 8$ )**

24  
-610.699899359085 a.u. (MP2/aVTZ)  
O 0.02277885 -0.00642763 -1.36056841  
H -0.35350277 0.81470964 -1.71809042  
H 0.94041503 -0.02947048 -1.68218566  
O 0.03595643 0.03255532 1.39201696  
H 0.01870483 0.00391823 0.41419927  
H -0.43363577 -0.76623765 1.68057286  
O 2.663003 -0.05776818 -2.30923264  
H 3.35691317 0.59089219 -2.16129158  
H 3.06006981 -0.74071521 -2.85701841  
O -1.36962325 -2.34584098 -2.28008022  
H -2.10685088 -2.02443086 -2.80480773  
H -0.92024782 -1.53860689 -1.9775137  
O -1.28291767 2.31025356 -2.33233582  
H -2.20040577 2.45386539 -2.08176456  
H -1.05242828 3.0590831 -2.88888718  
O -1.26123074 2.3769768 2.310626  
H -1.22530895 2.33442905 3.2692117  
H -0.81289113 1.56242053 2.01759024  
O 2.71148056 0.00580992 2.32264346  
H 2.79059137 0.81862817 2.82818407

H 1.79236635 0.0200714 1.99876032  
O -1.3313117 -2.24984041 2.37512133  
H -0.95436794 -2.93229834 2.93740311  
H -2.24454279 -2.51205777 2.22985758

**Doubly solvated monomer ( $N = 17$ )**

51

-1297.77823496 a.u. (MP2/aVTZ)

|   |             |             |             |
|---|-------------|-------------|-------------|
| O | -0.06849174 | -0.02143682 | -0.00638088 |
| H | -0.52608217 | 0.77020930  | -0.32510728 |
| H | -0.49768733 | -0.85461657 | -0.24985935 |
| O | -0.08228775 | 0.04010825  | 2.78593789  |
| H | 0.84119378  | 0.05499565  | 3.07686630  |
| H | -0.04943812 | 0.02248963  | 1.81831731  |
| O | 2.56869058  | -0.00784720 | -0.92622160 |
| H | 2.66518802  | 0.75980439  | -1.50852598 |
| H | 1.65041768  | 0.01265619  | -0.61957262 |
| O | -1.38834476 | 2.26195126  | -0.92570081 |
| H | -1.69513465 | 2.17686263  | -1.84020559 |
| H | -0.76696479 | 3.00462158  | -0.92831569 |
| O | -1.27881133 | -2.37728993 | -0.89300643 |
| H | -0.69573358 | -2.91352255 | -1.44992117 |
| H | -2.03588051 | -2.15048475 | -1.45254621 |
| O | 2.54568416  | 0.09478621  | 3.73028749  |
| H | 3.20180089  | 0.08742357  | 3.01815285  |
| H | 2.83452606  | -0.58499094 | 4.35650829  |
| O | -1.35099575 | -2.27684292 | 3.69320828  |
| H | -0.78947422 | -2.65973950 | 4.38296395  |
| H | -0.89198000 | -1.47646415 | 3.39930783  |
| O | -1.52197638 | 2.28126514  | 3.62589903  |
| H | -2.17420445 | 1.97672627  | 4.27361326  |
| H | -1.03609950 | 1.48886644  | 3.35440857  |
| O | 2.95334539  | 2.17781009  | -2.62208868 |
| H | 2.15504971  | 2.71502393  | -2.73073670 |
| H | 3.28722785  | 2.02471807  | -3.51805991 |
| O | 2.99951783  | -2.37529320 | -2.34418125 |
| H | 3.67510026  | -2.19007349 | -3.01273277 |
| H | 2.87186175  | -1.54274144 | -1.86643592 |
| O | 4.28522177  | 0.08601123  | 1.27508109  |
| H | 4.93238867  | -0.62575737 | 1.16444844  |
| H | 3.70674743  | 0.03372335  | 0.50028271  |
| O | -2.21780413 | 1.86133611  | -3.56246529 |
| H | -1.97329563 | 0.98948600  | -3.90564466 |
| H | -1.94402494 | 2.49413857  | -4.24238081 |
| O | 0.41102596  | 4.39591813  | -0.82837305 |

|   |             |             |             |
|---|-------------|-------------|-------------|
| H | 1.28236043  | 4.13859861  | -0.49334765 |
| H | 0.16820716  | 5.19304126  | -0.33510552 |
| O | -3.55062683 | 2.78793689  | 0.76216695  |
| H | -3.51024466 | 2.29029313  | 1.59186513  |
| H | -2.75942691 | 2.53101206  | 0.26651444  |
| O | 0.52244595  | -3.81381915 | -2.47189156 |
| H | 1.38755191  | -3.38437863 | -2.54154522 |
| H | 0.27278366  | -4.04347709 | -3.37886735 |
| O | -3.50831367 | -1.67823367 | -2.42325539 |
| H | -3.65258683 | -0.72153081 | -2.46305495 |
| H | -4.36937411 | -2.06166677 | -2.20137006 |
| O | -2.10015135 | -3.85468181 | 1.33044496  |
| H | -2.09537223 | -3.33720109 | 2.14890081  |
| H | -1.80501439 | -3.24659573 | 0.63704421  |

**Water cluster with ~3 solvation shells ( $N = 53$ )**

159

-4044.87096279 a.u. (PBE96-D3/def2-svpd)

|   |             |             |             |
|---|-------------|-------------|-------------|
| O | 2.18558230  | 5.77592379  | -2.07874456 |
| H | 2.39928169  | 4.83484978  | -2.33032124 |
| H | 2.30833397  | 5.77676499  | -1.09241134 |
| O | -0.71612465 | 1.47694471  | -5.27216547 |
| H | -0.55709098 | 2.32882874  | -4.79501053 |
| H | -1.60415878 | 1.19617083  | -4.95879869 |
| O | -3.19919493 | 2.23376064  | 4.76575176  |
| H | -3.26979162 | 2.36267425  | 3.76823957  |
| H | -3.76605662 | 2.90417352  | 5.18048650  |
| O | 0.08817339  | 6.57943766  | 1.96805230  |
| H | 0.13922929  | 5.96266707  | 2.72912766  |
| H | 0.99930648  | 6.52863664  | 1.60343140  |
| O | -0.31629346 | 6.02012814  | -2.50273107 |
| H | 0.71424969  | 6.00777794  | -2.34584158 |
| H | -0.51086127 | 6.80409777  | -3.04182947 |
| O | -2.12130006 | -4.79011075 | 1.25355844  |
| H | -1.25103520 | -5.20499358 | 1.44702311  |
| H | -1.94762602 | -3.83213240 | 1.09630886  |
| O | 3.52840925  | -1.82770124 | 2.87917689  |
| H | 3.29558761  | -1.98466232 | 3.81899243  |
| H | 4.18761998  | -2.56791971 | 2.54373330  |
| O | 1.46438435  | -1.72145378 | -0.74601330 |
| H | 1.39743721  | -2.12240256 | 0.17446546  |
| H | 2.37570571  | -1.30716441 | -0.83003799 |
| O | 5.48571044  | 1.50540997  | -0.71104425 |
| H | 5.16761542  | 2.21234601  | -0.07541659 |
| H | 6.40258261  | 1.29836876  | -0.46739602 |



|   |             |             |             |
|---|-------------|-------------|-------------|
| O | 0.05068094  | -2.74063572 | -4.36839087 |
| H | -0.02505958 | -3.28303022 | -5.16888694 |
| H | 0.57180481  | -3.27370231 | -3.65673404 |
| O | -0.10007826 | 3.43703257  | -3.42968565 |
| H | -0.26803108 | 4.39889796  | -3.25114761 |
| H | 0.87952352  | 3.29128367  | -3.25526875 |
| O | 5.45675570  | -3.04892154 | -0.60583025 |
| H | 4.96223828  | -2.22356780 | -0.82377735 |
| H | 4.92420971  | -3.76781919 | -1.05279670 |
| O | -5.38047363 | 0.50099642  | 1.68635030  |
| H | -5.17268537 | -0.35936697 | 1.25070935  |
| H | -4.51804466 | 0.98604083  | 1.80541631  |
| O | 4.13935129  | 3.28088848  | 0.79596497  |
| H | 4.01680086  | 3.09543891  | 1.76178781  |
| H | 3.36423378  | 2.79008857  | 0.38578787  |
| O | -1.96298818 | -1.74241719 | -2.90441955 |
| H | -1.26859206 | -2.14119406 | -3.50476603 |
| H | -1.47380122 | -1.38407081 | -2.12294143 |
| O | -2.68895979 | -5.69966238 | -1.22139578 |
| H | -2.61238756 | -5.37143207 | -0.27675431 |
| H | -3.18469181 | -4.98923825 | -1.71911435 |
| O | 2.41945350  | 3.10168789  | -2.65178826 |
| H | 2.31142767  | 2.52857145  | -1.85413545 |
| H | 3.29794488  | 2.79343099  | -3.05670082 |
| O | -6.02582048 | -1.85421398 | -1.98195532 |
| H | -6.97553060 | -2.03091924 | -2.08316988 |
| H | -5.86309139 | -0.93624686 | -2.37222726 |
| O | -3.21864911 | 2.06981933  | 2.14589745  |
| H | -2.36897536 | 1.57569436  | 1.96400597  |
| H | -3.23348219 | 2.71968519  | 1.38482851  |
| O | 0.96872987  | -0.17359948 | -3.94415121 |
| H | 0.65829804  | -1.06870259 | -4.22167401 |
| H | 0.41271236  | 0.46829380  | -4.47913005 |
| O | -1.53029416 | 1.90812895  | -1.83424045 |
| H | -2.08681586 | 2.46278811  | -1.21641646 |
| H | -0.95739865 | 2.53640073  | -2.38437374 |
| O | 4.97477478  | -3.69023320 | 1.93138234  |
| H | 4.34612373  | -4.43372812 | 1.77976021  |
| H | 5.25106936  | -3.42397283 | 0.99209661  |
| O | -1.81612028 | -1.54863348 | 3.34633750  |
| H | -1.99850339 | -1.70106218 | 2.37318921  |
| H | -2.66311215 | -1.15836277 | 3.72229951  |
| O | -5.51771270 | 2.27946653  | -0.58956964 |
| H | -5.65280958 | 1.67356957  | 0.18243616  |
| H | -5.54262204 | 1.69660355  | -1.38608709 |
| O | -4.91276462 | -1.99160302 | 0.45377172  |

|   |             |             |             |
|---|-------------|-------------|-------------|
| H | -5.37020234 | -1.98770812 | -0.43860812 |
| H | -5.21914920 | -2.79018777 | 0.91664551  |
| O | 3.90967820  | -0.75322072 | -1.20997112 |
| H | 4.39459910  | 0.05176076  | -0.90143319 |
| H | 3.83526843  | -0.64505896 | -2.20042131 |
| O | -2.21590601 | -2.06188961 | 0.75316539  |
| H | -1.72745437 | -1.45794454 | 0.13899638  |
| H | -3.17921122 | -2.01374771 | 0.51568146  |
| O | -5.46860298 | 0.58893559  | -2.87840053 |
| H | -6.00959332 | 0.94734999  | -3.60248287 |
| H | -4.49053888 | 0.60891501  | -3.22424584 |
| O | 1.28005594  | -3.85212773 | -2.41312691 |
| H | 1.33429441  | -3.09863836 | -1.75309782 |
| H | 0.70991297  | -4.57577530 | -2.02301871 |
| O | 3.11634119  | 2.70076614  | 3.29971522  |
| H | 3.55511531  | 2.72857623  | 4.16519131  |
| H | 2.26915611  | 3.27614714  | 3.38453395  |
| O | 3.53680128  | -0.32353370 | -3.85307873 |
| H | 3.81646459  | -0.98140713 | -4.50983226 |
| H | 2.51720663  | -0.21407688 | -3.95452195 |
| O | -0.84811774 | 1.10537440  | 1.49954826  |
| H | -0.73563731 | 0.44347920  | 0.75484019  |
| H | -0.40389998 | 0.75956213  | 2.30766615  |
| O | 2.32622108  | 0.36601464  | 2.07701093  |
| H | 2.93443049  | -0.40895520 | 2.28209396  |
| H | 2.67997319  | 1.14013164  | 2.59234561  |
| O | 0.32028448  | -0.10694700 | 3.79690029  |
| H | -0.45827206 | -0.72507105 | 3.57351576  |
| H | 1.03264237  | -0.09982198 | 3.08814728  |
| O | -0.07131944 | -3.65340462 | 3.70220639  |
| H | 0.52891074  | -3.30680648 | 4.39864951  |
| H | -0.86546322 | -3.06453279 | 3.74521730  |
| O | 2.06338283  | 1.87512254  | -0.21300550 |
| H | 2.12098393  | 1.12980353  | 0.44159813  |
| H | 1.28351205  | 2.42320264  | 0.06471129  |
| O | 0.10707366  | 3.46628350  | 0.77901941  |
| H | -0.53810306 | 4.12561492  | 0.36700933  |
| H | -0.38609092 | 2.63241432  | 1.02751526  |
| O | 1.79836335  | -1.96688205 | 5.17481412  |
| H | 1.87923242  | -1.86526111 | 6.13682076  |
| H | 1.25946795  | -1.19168495 | 4.85618257  |
| O | 2.31055902  | 5.37897598  | 0.62550840  |
| H | 1.62719387  | 4.67566556  | 0.67466701  |
| H | 3.15381832  | 4.87423708  | 0.75313050  |
| O | -3.84960119 | -3.69089580 | -2.59320456 |
| H | -4.69869869 | -3.22018518 | -2.47257711 |

|   |             |             |             |
|---|-------------|-------------|-------------|
| H | -3.17134243 | -2.97135906 | -2.67170338 |
| O | -0.40984287 | 2.32513794  | 4.94807419  |
| H | -1.39679699 | 2.32582758  | 5.00490469  |
| H | -0.16127035 | 1.42325648  | 4.62801644  |
| O | -3.01678103 | 0.61129650  | -3.64607940 |
| H | -2.66162812 | -0.31420552 | -3.49287307 |
| H | -2.51709040 | 1.15477299  | -2.96156117 |
| O | 0.26308232  | -6.45169703 | 1.02972612  |
| H | -0.03311058 | -7.33935287 | 1.28869924  |
| H | 0.11604869  | -6.38535939 | 0.04108463  |
| O | -1.40348986 | 5.46116755  | -0.07653203 |
| H | -1.05317347 | 5.79569798  | -0.94950480 |
| H | -0.99819573 | 6.02249522  | 0.64249008  |
| O | -0.20951797 | -5.96575036 | -1.59310974 |
| H | -0.03759475 | -6.69069855 | -2.21694408 |
| H | -1.25880503 | -5.84569626 | -1.54586497 |
| O | 2.72794009  | -5.18952382 | 1.04863746  |
| H | 2.21744485  | -4.34854465 | 1.20594048  |
| H | 2.03187934  | -5.87740539 | 1.16768884  |
| O | -4.09252236 | -0.40320680 | 4.23118112  |
| H | -4.72829024 | -0.19740072 | 3.50880977  |
| H | -3.86599223 | 0.48158230  | 4.60556814  |
| O | -0.72892167 | -0.36478696 | -0.75206953 |
| H | 0.21361780  | -0.73342684 | -0.86300451 |
| H | -0.86658987 | 0.50437796  | -1.24049565 |
| O | 1.38631369  | -2.86692677 | 1.62694085  |
| H | 0.74335322  | -3.17951031 | 2.34088158  |
| H | 2.15465551  | -2.46651456 | 2.13183888  |
| O | 4.73084568  | 2.12266396  | -3.42669291 |
| H | 5.15128638  | 1.96563492  | -2.54968157 |
| H | 4.42627041  | 1.22618426  | -3.71918240 |
| O | -3.14088478 | 3.34261608  | -0.18320151 |
| H | -4.09635336 | 3.13092888  | -0.43576641 |
| H | -2.91715206 | 4.30100583  | -0.21655093 |
| O | 0.86207793  | 4.02830263  | 3.38129949  |
| H | 0.30070707  | 3.45008437  | 3.99403382  |
| H | 0.52480149  | 3.83911033  | 2.46761514  |
| O | 3.77081741  | -5.00213033 | -1.51400382 |
| H | 3.00906979  | -4.62086731 | -2.00463513 |
| H | 3.39119235  | -5.17683029 | -0.61239138 |

**Water cluster with ~4 solvation shells ( $N = 102$ )**

306

-7784.512904675292 a.u. (PBE96-D3/def2-svpd; 26 lin dep.)

|   |             |            |             |
|---|-------------|------------|-------------|
| O | -4.51217055 | 5.68730278 | -3.07824506 |
|---|-------------|------------|-------------|

|   |             |             |             |
|---|-------------|-------------|-------------|
| H | -3.69199651 | 5.26589269  | -3.45968355 |
| H | -4.23166511 | 6.17815086  | -2.26852086 |
| O | -4.23636362 | 0.13010929  | -5.93817484 |
| H | -4.33901712 | 0.91931005  | -5.33787745 |
| H | -4.70944617 | -0.59309407 | -5.48511050 |
| O | -6.61652486 | 2.57868405  | 2.78853065  |
| H | -6.76060274 | 2.67787711  | 3.74311793  |
| H | -5.70097685 | 2.20340316  | 2.69834945  |
| O | -4.01227252 | 0.98366051  | 4.96345855  |
| H | -4.11611178 | 0.97325330  | 3.96434518  |
| H | -4.22089706 | 0.04661066  | 5.22360437  |
| O | -2.66128654 | -6.53327679 | -2.61867247 |
| H | -2.56364466 | -5.56477412 | -2.38415640 |
| H | -1.74183194 | -6.80679811 | -2.84751440 |
| O | -7.39356864 | -5.34248077 | -2.52212558 |
| H | -8.16870280 | -5.67880860 | -2.99419195 |
| H | -6.66183210 | -6.01754687 | -2.63790105 |
| O | -5.44487544 | -7.18093496 | -2.68202595 |
| H | -4.53167061 | -6.95067640 | -2.97138339 |
| H | -5.30362832 | -7.47675994 | -1.75919926 |
| O | -5.54108461 | 4.86005563  | 0.71765678  |
| H | -5.51105219 | 5.00730054  | 1.69323524  |
| H | -5.12077806 | 5.65808962  | 0.30682642  |
| O | -6.21951348 | 3.77674049  | -3.10665499 |
| H | -5.58222613 | 4.59014353  | -3.02839160 |
| H | -6.97019018 | 4.07630042  | -3.64588506 |
| O | 4.87616204  | 4.96717973  | -1.86116927 |
| H | 4.54523843  | 5.46528402  | -2.65322759 |
| H | 5.49880461  | 4.26162360  | -2.22990397 |
| O | 0.37102889  | -3.77229942 | 2.36971744  |
| H | 1.17513215  | -3.87586237 | 1.76646396  |
| H | 0.31935890  | -2.81180673 | 2.56041654  |
| O | 3.18996674  | 2.90724294  | -1.06545605 |
| H | 3.64700530  | 3.74148253  | -1.32519445 |
| H | 3.62241761  | 2.19837547  | -1.60988809 |
| O | 0.99533847  | 0.56578709  | -1.87003312 |
| H | 1.56227709  | 0.69113615  | -1.06600731 |
| H | 1.13226100  | 1.33917279  | -2.49752056 |
| O | 3.99254482  | 5.70545967  | -4.31984152 |
| H | 4.23480292  | 6.45697811  | -4.88483505 |
| H | 4.42341669  | 4.87129750  | -4.73307179 |
| O | 2.12500764  | -6.47793689 | 5.59691829  |
| H | 1.21472901  | -6.16189607 | 5.39998416  |
| H | 2.27456329  | -7.15953527 | 4.88212949  |
| O | 1.38029634  | 5.03822773  | -3.76928584 |
| H | 0.99300419  | 5.54998210  | -2.98870701 |

|   |             |             |             |
|---|-------------|-------------|-------------|
| H | 2.27603967  | 5.39469632  | -3.98983207 |
| O | -0.62482514 | -1.98999336 | -4.99171480 |
| H | -0.18118330 | -2.64131340 | -5.56613812 |
| H | 0.06569333  | -1.81392940 | -4.25186202 |
| O | -4.26506629 | 2.16038104  | -4.13289923 |
| H | -5.07287120 | 2.66885391  | -3.85051242 |
| H | -3.54673563 | 2.86577908  | -4.22539982 |
| O | 3.49810158  | 1.39927965  | -4.91762976 |
| H | 2.67295220  | 1.79731905  | -4.50104624 |
| H | 3.17487557  | 0.75584249  | -5.61101066 |
| O | -5.38910013 | -2.26444943 | 2.99353458  |
| H | -4.59524508 | -2.59113072 | 2.48715226  |
| H | -5.97726491 | -1.84292601 | 2.31497199  |
| O | -0.05019248 | 6.12280879  | -1.85421534 |
| H | 0.22957249  | 6.17805174  | -0.91004796 |
| H | -0.59795218 | 5.29736152  | -1.85217734 |
| O | -2.75022603 | -2.17248272 | -3.37018178 |
| H | -2.02155376 | -2.15537734 | -4.04988334 |
| H | -2.89757996 | -1.24726330 | -3.05207486 |
| O | 1.00558423  | -2.59513526 | 5.43457586  |
| H | 0.12728624  | -2.19940046 | 5.21788650  |
| H | 1.53495402  | -1.81694586 | 5.77749007  |
| O | 1.61371011  | 4.85972704  | 5.26828795  |
| H | 2.61606486  | 5.01759373  | 5.39391438  |
| H | 1.15252899  | 5.39289608  | 5.93600294  |
| O | 4.22372445  | 5.05621065  | 5.31301991  |
| H | 4.37635051  | 4.13990602  | 5.65437091  |
| H | 4.36743581  | 4.96394107  | 4.33854185  |
| O | 1.06785146  | 2.14099768  | 5.78180412  |
| H | 1.14791618  | 3.10015666  | 5.54660856  |
| H | 0.10771183  | 1.93011705  | 5.78173564  |
| O | -0.68630737 | -4.90109026 | 0.14317988  |
| H | -0.49782247 | -4.26777109 | 0.88520187  |
| H | -1.36700757 | -4.47509066 | -0.47662214 |
| O | -2.51187620 | 4.12644327  | -4.06058476 |
| H | -1.95576781 | 3.85574509  | -3.28268634 |
| H | -1.84900510 | 4.47697510  | -4.74689519 |
| O | -4.61593511 | -4.40522314 | -0.10937998 |
| H | -4.61121473 | -5.40272275 | -0.17733112 |
| H | -5.43800517 | -3.99335804 | -0.51953541 |
| O | 3.76201447  | -5.55173375 | -0.95021479 |
| H | 3.07444797  | -6.24591289 | -1.01069976 |
| H | 4.05253118  | -5.25834731 | -1.85960645 |
| O | -4.28379737 | 1.22024431  | 2.34671847  |
| H | -3.35660262 | 1.43814702  | 2.03727960  |
| H | -4.63968586 | 0.77579501  | 1.53014300  |

|   |             |             |             |
|---|-------------|-------------|-------------|
| O | 4.81718591  | -3.49484235 | -5.66244752 |
| H | 5.10301987  | -4.20635954 | -6.25851963 |
| H | 5.07170062  | -2.63364930 | -6.12366958 |
| O | -1.61539486 | 0.03108835  | -6.44888272 |
| H | -1.25719031 | -0.70458346 | -5.87558904 |
| H | -2.61480470 | 0.02204996  | -6.32429517 |
| O | 3.71925250  | -5.68513700 | 2.52875451  |
| H | 3.56476615  | -5.12186568 | 3.35197749  |
| H | 4.66609046  | -5.60515998 | 2.29712180  |
| O | -3.65831435 | 0.25305218  | -2.39798237 |
| H | -4.18991197 | 0.36485774  | -1.54218774 |
| H | -3.85186721 | 1.04263511  | -2.99662756 |
| O | 6.44243953  | 2.96562754  | -2.65827025 |
| H | 5.81304904  | 2.17519413  | -2.59752618 |
| H | 7.01756421  | 2.88276554  | -1.86577864 |
| O | 4.62134083  | 1.06215871  | -2.52832827 |
| H | 4.94427870  | 0.19676191  | -2.13669428 |
| H | 4.23415184  | 0.92210151  | -3.43704702 |
| O | 0.05629084  | -0.78387018 | 2.69134422  |
| H | -0.44606699 | -1.12079616 | 1.85677786  |
| H | -0.57094638 | -0.92170041 | 3.45551783  |
| O | -6.73821591 | -1.26773097 | 0.77946579  |
| H | -7.44069367 | -0.55036457 | 0.85339172  |
| H | -6.98523667 | -1.94183694 | 0.09711991  |
| O | -3.18282912 | -3.25708836 | 1.78743715  |
| H | -3.72495128 | -3.76059583 | 1.10857183  |
| H | -2.90168448 | -3.91541131 | 2.47250920  |
| O | 3.97285298  | 2.42678962  | 5.96486562  |
| H | 3.16763359  | 2.25225680  | 6.48911521  |
| H | 4.50472104  | 1.57679431  | 5.95362471  |
| O | 1.31099169  | 2.39568726  | -3.76958328 |
| H | 1.36613441  | 3.39681378  | -3.64754594 |
| H | 0.71801244  | 2.26591432  | -4.56204496 |
| O | -3.95443535 | -7.02964309 | -0.26370157 |
| H | -3.34746548 | -6.97523940 | -1.05405359 |
| H | -3.34092165 | -7.12348725 | 0.50529785  |
| O | -2.19839434 | 8.00454323  | 1.20017807  |
| H | -2.16433227 | 7.20451494  | 1.77295154  |
| H | -1.26672133 | 8.31949415  | 1.21834289  |
| O | -3.48844640 | 3.67949598  | 5.21597301  |
| H | -3.92961221 | 2.80132481  | 5.22768332  |
| H | -4.04674844 | 4.26934486  | 4.65663313  |
| O | -1.13315991 | -1.83378558 | 0.67339250  |
| H | -1.38775853 | -1.14249315 | 0.00399584  |
| H | -1.95370298 | -2.28229108 | 1.01304831  |
| O | -4.19488009 | -1.69522012 | 5.16542954  |

|   |             |             |             |
|---|-------------|-------------|-------------|
| H | -4.75323776 | -1.86580131 | 4.31039559  |
| H | -4.58923637 | -2.24446594 | 5.86165730  |
| O | 5.63998613  | -4.37717261 | 0.75172873  |
| H | 5.21118963  | -3.68100406 | 1.31483856  |
| H | 4.92370692  | -4.81496540 | 0.22180213  |
| O | 3.23770189  | -4.22783243 | 4.69604298  |
| H | 2.45569238  | -3.62860642 | 4.76555833  |
| H | 2.93509263  | -5.06720343 | 5.17878780  |
| O | 0.26239327  | -8.42691600 | 1.58453483  |
| H | -0.59432719 | -7.90818819 | 1.70402757  |
| H | 0.00775378  | -9.36163347 | 1.51275505  |
| O | -6.64723210 | -3.11537443 | -1.28763267 |
| H | -7.10576295 | -3.88857666 | -1.72636642 |
| H | -6.26706670 | -2.59917671 | -2.05217929 |
| O | 7.21861743  | 2.89750211  | 0.06685897  |
| H | 6.80600883  | 3.76758504  | 0.33475876  |
| H | 8.03172796  | 2.80586482  | 0.58979823  |
| O | 5.40076324  | 0.86595543  | 0.86892841  |
| H | 6.00852811  | 1.58518751  | 0.57813939  |
| H | 5.52591953  | 0.13564514  | 0.19969579  |
| O | 1.21837164  | -1.72943561 | -3.22062996 |
| H | 1.26925640  | -0.90621973 | -2.65548695 |
| H | 1.19480248  | -2.53941043 | -2.63230220 |
| O | 0.24802592  | 5.48601488  | 0.84069857  |
| H | 0.88868519  | 5.70749284  | 1.58558267  |
| H | -0.63531596 | 5.58475554  | 1.26681448  |
| O | 2.33477067  | -0.38466883 | 6.13169122  |
| H | 3.28472861  | -0.33119032 | 5.87233326  |
| H | 1.92889561  | 0.48928319  | 5.92674463  |
| O | -0.06932039 | 2.16623137  | -6.08207899 |
| H | 0.49358806  | 1.91899423  | -6.84195571 |
| H | -0.78480014 | 1.45936631  | -6.10862967 |
| O | -1.98857980 | 1.74006649  | 1.20545028  |
| H | -1.74844697 | 1.17729298  | 0.39087162  |
| H | -1.14843347 | 1.89858291  | 1.71261664  |
| O | 5.08195059  | -4.57077121 | -3.04797909 |
| H | 5.81604494  | -4.11997093 | -2.56961203 |
| H | 4.96965796  | -4.09300659 | -3.89997274 |
| O | 6.92584632  | -3.32944444 | -1.28947891 |
| H | 6.53523052  | -3.73505177 | -0.44401371 |
| H | 7.88140410  | -3.49657101 | -1.26073839 |
| O | 2.49999486  | -8.03578616 | 3.36902647  |
| H | 2.99522304  | -7.31378578 | 2.91429340  |
| H | 1.69513173  | -8.17344948 | 2.82126479  |
| O | 0.57846569  | 8.48224036  | 1.90379891  |
| H | 1.11991781  | 7.74030901  | 2.26245426  |

|   |             |             |             |
|---|-------------|-------------|-------------|
| H | 0.83065705  | 9.26055233  | 2.42444949  |
| O | 0.74827130  | 3.01106189  | 0.03975347  |
| H | 1.65457510  | 2.97049879  | -0.38557057 |
| H | 0.61593988  | 3.96076086  | 0.34182021  |
| O | 4.64982108  | -2.62979713 | 2.73815164  |
| H | 3.87952946  | -1.99813986 | 2.67063519  |
| H | 4.43293684  | -3.16000091 | 3.53766627  |
| O | -1.88040541 | -6.83901044 | 1.61095039  |
| H | -2.15367070 | -6.36576665 | 2.44137722  |
| H | -1.47473312 | -6.11686304 | 1.04406117  |
| O | -4.65396854 | 5.48645150  | 3.36645042  |
| H | -3.72807564 | 5.61467182  | 2.99357968  |
| H | -4.91717078 | 6.35212983  | 3.72136416  |
| O | 0.40198937  | 1.94611292  | 2.45792946  |
| H | 0.35824483  | 0.94923481  | 2.50510712  |
| H | 0.70396711  | 2.21980965  | 1.53047633  |
| O | -8.13758967 | 0.99373047  | 1.04607777  |
| H | -7.87788150 | 1.57933662  | 0.29837757  |
| H | -7.73200711 | 1.47036526  | 1.81412208  |
| O | 2.73884028  | -0.70421546 | 2.72964559  |
| H | 2.98926859  | 0.15309783  | 3.16403952  |
| H | 1.76775567  | -0.84324212 | 2.90650109  |
| O | 5.46055783  | -1.01276519 | -1.11109808 |
| H | 4.57859031  | -1.50174030 | -0.95427408 |
| H | 6.13330940  | -1.72295691 | -1.25965130 |
| O | -1.26713029 | 3.60775029  | -1.74316629 |
| H | -0.51158251 | 3.20807667  | -1.23032678 |
| H | -2.00696238 | 3.69642809  | -1.09334040 |
| O | -3.05699167 | 3.88897033  | 0.29431124  |
| H | -4.04248659 | 3.95663839  | 0.41815186  |
| H | -2.71305822 | 3.00735295  | 0.66554670  |
| O | 5.15978644  | 3.53758609  | -5.17173478 |
| H | 5.84272358  | 3.33883067  | -4.49504023 |
| H | 4.56224741  | 2.73501493  | -5.18529610 |
| O | 3.07819747  | 2.01052905  | 3.36449982  |
| H | 3.29215572  | 2.19216278  | 4.31716866  |
| H | 2.09985175  | 2.13025829  | 3.27272314  |
| O | -3.68441981 | 6.55618663  | -0.55159357 |
| H | -3.09197870 | 5.78267520  | -0.47623205 |
| H | -3.16928932 | 7.27503033  | -0.08151234 |
| O | -2.45594953 | -4.07254311 | -1.58346772 |
| H | -3.33211946 | -4.09086567 | -1.09163671 |
| H | -2.48543556 | -3.28514984 | -2.20832986 |
| O | -1.07117376 | 3.89406859  | 4.01483764  |
| H | -1.88462218 | 3.61452203  | 4.52329523  |
| H | -0.62626521 | 3.11190475  | 3.62022509  |



|   |             |             |             |
|---|-------------|-------------|-------------|
| O | -5.48500234 | -1.75744290 | -3.42200899 |
| H | -4.66311949 | -2.27287759 | -3.59764252 |
| H | -5.09383994 | -0.93421070 | -3.04775048 |
| O | 6.07674618  | -0.32174800 | 3.24427255  |
| H | 5.74218013  | -1.23585067 | 3.05268238  |
| H | 5.84051527  | 0.20306612  | 2.42624317  |
| O | 1.19706629  | -6.90916695 | -0.53163411 |
| H | 0.65690048  | -6.13250534 | -0.23940519 |
| H | 0.98825279  | -7.60068958 | 0.14931279  |
| O | 2.44663362  | -4.06744142 | 0.84000309  |
| H | 2.97000894  | -4.64417882 | 1.47503762  |
| H | 2.61579876  | -4.52106919 | -0.02823917 |
| O | 5.80254667  | 5.16078808  | 0.53884803  |
| H | 6.21840500  | 6.01252266  | 0.75205963  |
| H | 5.40318907  | 5.25833271  | -0.39246740 |
| O | -6.56859925 | 2.68326515  | -0.63752096 |
| H | -6.53670796 | 3.04590826  | -1.56422779 |
| H | -6.34395957 | 3.46256638  | -0.06809870 |
| O | 4.03498340  | 4.48841887  | 2.56776076  |
| H | 3.76319661  | 3.53368191  | 2.63843067  |
| H | 4.65653705  | 4.60298057  | 1.80848945  |
| O | 1.00454080  | -4.10201644 | -2.04786676 |
| H | 0.71259270  | -4.84863657 | -2.61495762 |
| H | 0.45303100  | -4.18437494 | -1.23994051 |
| O | 3.06623150  | -1.89453515 | -0.70175464 |
| H | 2.81401717  | -1.01478503 | -0.32135190 |
| H | 2.88022969  | -2.56702057 | -0.00184561 |
| O | -1.42370092 | -1.35174322 | 4.87481007  |
| H | -2.37181241 | -1.64055692 | 4.89797212  |
| H | -1.40751967 | -0.51753511 | 5.41681702  |
| O | 2.67550413  | -0.39754199 | -6.76836852 |
| H | 2.41707152  | -1.26436302 | -6.30885249 |
| H | 1.92529694  | -0.18169459 | -7.37848198 |
| O | 5.06478773  | 0.05577958  | 5.57404936  |
| H | 5.46696127  | -0.03661321 | 4.62431246  |
| H | 5.68664623  | -0.38109340 | 6.17809490  |
| O | 1.86353904  | 6.09716855  | 2.82022007  |
| H | 2.71165178  | 5.60254463  | 2.63317777  |
| H | 1.56903323  | 5.70592730  | 3.68672619  |
| O | -2.54241468 | -5.17750720 | 3.71081028  |
| H | -3.25216587 | -5.38505344 | 4.33994431  |
| H | -1.68159560 | -5.07407004 | 4.24478905  |
| O | -1.43808753 | 0.29999800  | -0.89328059 |
| H | -0.54100609 | 0.45035788  | -1.33266299 |
| H | -2.16252936 | 0.37306109  | -1.57459173 |
| O | 2.56076816  | 0.54767982  | 0.38249863  |

|   |             |             |             |
|---|-------------|-------------|-------------|
| H | 2.60437161  | 0.08010265  | 1.26574779  |
| H | 3.38225282  | 1.08793531  | 0.37294446  |
| O | 0.12315763  | -6.73513690 | -2.96540094 |
| H | 0.59468809  | -7.23355999 | -3.65194960 |
| H | 0.54306532  | -6.99192178 | -2.08832612 |
| O | -0.61743528 | 4.87732353  | -5.71501262 |
| H | 0.12868769  | 5.07602273  | -5.09104057 |
| H | -0.42302917 | 3.96196097  | -6.02890193 |
| O | -5.03917157 | 0.53046155  | -0.17331054 |
| H | -5.66984534 | -0.21918158 | 0.06237499  |
| H | -5.61735580 | 1.33648119  | -0.34773156 |
| O | -2.19558299 | 5.45092845  | 2.28514641  |
| H | -1.71095597 | 4.85365794  | 2.96200887  |
| H | -2.51585178 | 4.84063108  | 1.55486326  |
| O | 5.21554816  | -1.23422558 | -6.99519337 |
| H | 4.30072328  | -0.83407274 | -7.07085431 |
| H | 5.78202049  | -0.52484163 | -6.64904944 |
| O | -1.57214575 | 1.11453822  | 6.00835564  |
| H | -2.47857930 | 1.18198504  | 5.56197118  |
| H | -1.74215863 | 1.26658055  | 6.95315812  |
| O | 2.18762286  | -2.66486514 | -5.51485010 |
| H | 2.05844396  | -2.32981742 | -4.58496559 |
| H | 3.06326147  | -3.12544877 | -5.52792882 |
| O | -0.14591162 | -4.96826429 | 4.70444995  |
| H | 0.18253273  | -4.62169919 | 3.81916049  |
| H | 0.14737902  | -4.24638984 | 5.31117200  |
| O | 0.40774376  | 0.24070535  | -8.20234041 |
| H | -0.46400741 | 0.06182747  | -7.74587276 |
| H | 0.24936570  | 0.17346203  | -9.15661314 |

## References:

- (1) Heindel, J. P.; Xantheas, S. S. The Many-Body Expansion for Aqueous Systems Revisited: I. Water–Water Interactions. *J. Chem. Theory Comput.* **2020**, *16* (11), 6843–6855. <https://doi.org/10.1021/acs.jctc.9b00749>.
- (2) Miliordos, E.; Xantheas, S. S. An Accurate and Efficient Computational Protocol for Obtaining the Complete Basis Set Limits of the Binding Energies of Water Clusters at the MP2 and CCSD(T) Levels of Theory: Application to  $(\text{H}_2\text{O})_m$ ,  $m = 2-6, 8, 11, 16$ , and  $17$ . *J. Chem. Phys.* **2015**, *142* (23), 234303. <https://doi.org/10.1063/1.4922262>.
